# Supplementary material for: PD-L1 and PD-L2 expression correlated genes in non-small-cell lung cancer
Source: PubMed Central journal article supplement (PMC6545701; doi:10.1186/s40880-019-0376-6), 2019-06-03

A

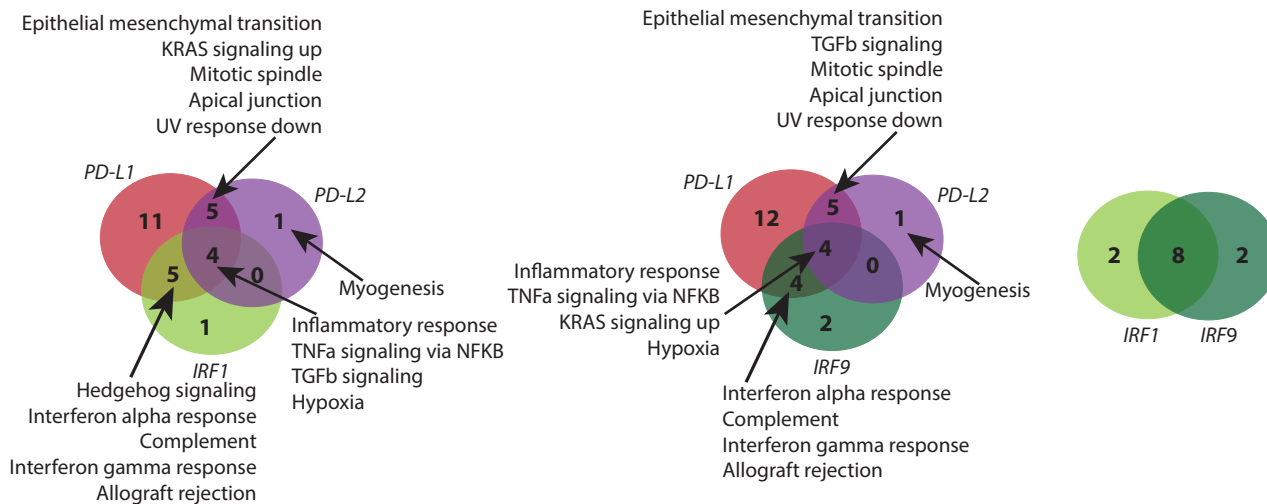

B

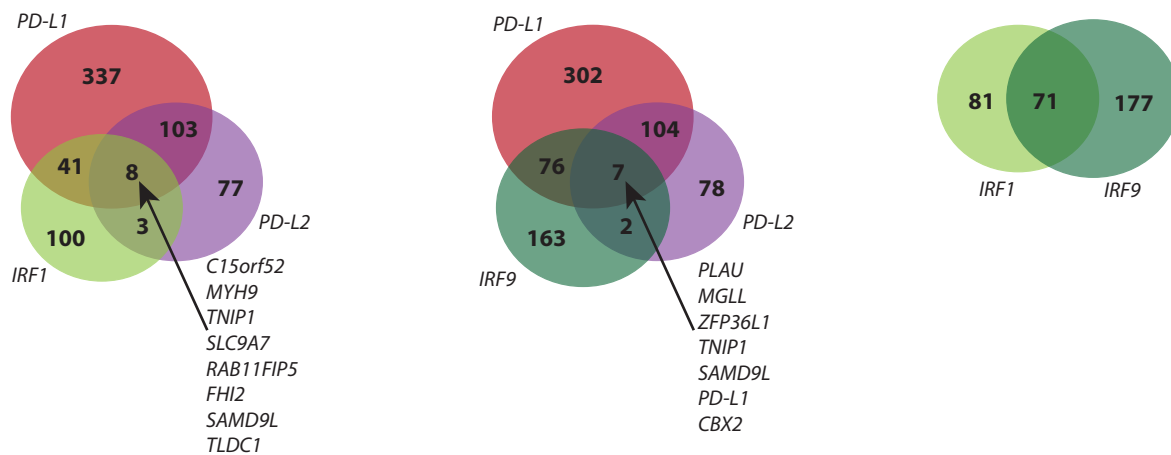

Supplement: 40880_2019_376_MOESM2_ESM.pdf [file 40880_2019_376_MOESM2_ESM.pdf]
