# Supplementary material for: PD-L1 and PD-L2 expression correlated genes in non-small-cell lung cancer
Source: Cancer Commun (Lond). 2019 Jun 3;39:30. doi: 10.1186/s40880-019-0376-6 (PMC6545701; doi:10.1186/s40880-019-0376-6)
Supplement: Supplementary file 1 — Additional file 1: Table S1. Expression correlated genes for PD-L1, PD-L2, and both. [file 40880_2019_376_MOESM1_ESM.xlsx]

## Sheet: Expression correlated genes
Table S1 Expression correlated genes for PD-L1, PD-L2, and both.
		CCLE dataset (Lung-NSC)					TCGA dataset (LUAD)							TCGA dataset (LUSC)
PD-L1 expression correlated genes (n = 489)		PD-L2 expression correlated genes (n = 191)		PD-L1 and PD-L2 expression correlated genes (n = 111)			PD-L1 expression correlated genes (n = 257)		PD-L2 expression correlated genes (n = 914)		PD-L1 and PD-L2 expression correlated genes (n = 211)			PD-L1 expression correlated genes (n = 26)		PD-L2 expression correlated genes (n = 326)		PD-L1 and PD-L2 expression correlated genes (n = 13)
Gene name	Spearman r (P < 0.05)	Gene name	Spearman r (P < 0.05)	Gene name			Gene name	Spearman r (P < 0.05)	Gene name	Spearman r (P < 0.05)	Gene name			Gene name	Spearman r (P < 0.05)	Gene name	Spearman r (P < 0.05)	Gene name
PD-L1	1.00	PD-L2	1.00	ABL2			PD-L1	1.00	PD-L2	1.00	ADAP2			PD-L1	1.00	PD-L2	1.00	APOL6
LINC00973	0.69	MICAL2	0.63	ABLIM3			PD-L2	0.76	SLAMF8	0.85	AIM2			PD-L2	0.73	TNFSF13B	0.76	FASLG
ARHGDIB	0.65	PD-L1	0.63	ACACB			GBP1	0.72	LCP2	0.84	AKAP2			RIC1	0.63	IL2RA	0.75	GBP4
SEMA7A	0.65	SEMA7A	0.59	ANTXR2			LCP2	0.68	TNFSF13B	0.84	ANO6			JAK2	0.57	CD80	0.74	GPR174
F3	0.64	FILIP1L	0.57	ARHGAP10			SAMD9L	0.67	PLEK	0.83	AOAH			PLGRKT	0.54	SLAMF8	0.74	PD-L1
CAB39	0.63	FOSL1	0.56	ARHGEF28			LILRB2	0.67	CD53	0.83	APOBEC3C			RANBP6	0.52	FPR3	0.74	PD-L2
PD-L2	0.63	PPP1R18	0.56	ATAD2B			LHFPL2	0.67	CD86	0.82	APOBEC3G			STX11	0.49	HAVCR2	0.74	PLGRKT
PLAU	0.63	ACTN1	0.55	AXL			FPR3	0.67	TLR8	0.82	APOL3			SMARCA2	0.47	PD-L1	0.73	PRF1
RAC2	0.63	EPHB2	0.55	C11orf68			FCGR3A	0.67	FCGR3A	0.82	APOL6			TLR6	0.47	LCP2	0.73	RANBP6
PLAUR	0.62	SPOCD1	0.53	C15orf52			CYBB	0.67	AOAH	0.82	ARNTL2			KDM4C	0.46	CYBB	0.73	RIC1
TRIO	0.62	FRMD6	0.53	CBX2			CD80	0.67	TFEC	0.82	ATG7			CDC37L1	0.44	FGL2	0.73	SLA2
ANXA3	0.61	HOMER3	0.52	CCDC121			SLAMF8	0.66	HAVCR2	0.82	AXL			RCL1	0.44	TLR8	0.73	STAT1
SMURF2	0.61	UAP1	0.52	CD59			SAMHD1	0.66	FPR3	0.82	BATF2			GPR174	0.44	FCGR1A	0.73	TLR1
SP100	0.61	TNFRSF12A	0.52	CDC42EP1			HAVCR2	0.66	CYBB	0.81	BEND6			AK3	0.43	FCGR3A	0.73
CDA	0.6	SERPINE1	0.52	COL13A1			TNFRSF9	0.65	SLC31A2	0.81	C10ORF55			UHRF2	0.43	C3AR1	0.72
FILIP1L	0.6	APCDD1L	0.52	CYC1			TFEC	0.65	GBP1	0.81	C11ORF49			TDRD7	0.42	CMKLR1	0.72
ITGA2	0.6	PDLIM7	0.51	CYR61			SLC31A2	0.65	C1QC	0.8	C1QA			SLA2	0.42	TFEC	0.72
RUNX1	0.6	LOXL2	0.51	DCBLD2			PLEK	0.65	C3AR1	0.8	C1QB			STAT1	0.41	GIMAP4	0.72
MGLL	0.59	RAC2	0.5	DPP9			C1QC	0.65	LILRB2	0.8	C1QC			GNA13	0.41	PTPRC	0.72
MICAL2	0.59	MYH9	0.5	E2F2			TNFSF13B	0.64	PIK3AP1	0.8	C3AR1			GBP4	0.41	CD53	0.71
SRPX2	0.59	AOX1	0.5	EHD1			TLR8	0.64	PTPRC	0.8	CALHM6			APOL6	0.41	FCER1G	0.71
CAPN2	0.58	RAB11FIP5	0.5	ELK3			PTAFR	0.64	SAMSN1	0.8	CASP5			FASLG	0.41	GPR65	0.71
DDX58	0.58	EXT1	0.5	EMP1			PIK3AP1	0.64	GIMAP4	0.79	CCDC88A			TTC39B	0.41	LILRB4	0.71
EPHB2	0.58	PEA15	0.49	EPHB2			IL12RB1	0.64	IL12RB1	0.79	CCL3			KIAA2026	0.4	PTPN22	0.71
FOSL1	0.58	COTL1	0.49	ETS1			CD86	0.64	GPR65	0.79	CCL4			PRF1	0.4	CD84	0.71
ITGA3	0.58	ELK3	0.49	EVA1A			CD53	0.64	NCKAP1L	0.79	CCL4L1			TLR1	0.4	SLC7A7	0.71
LAMC2	0.58	FAM167A	0.48	EXT1			CCR5	0.64	LAPTM5	0.79	CCL8					PLEK	0.7
NCF2	0.58	SH3BGRL3	0.48	F3			CCL4	0.64	MS4A6A	0.78	CCR5					ADAMDEC1	0.7
KIAA1462	0.57	ZYX	0.48	FAM129B			C3AR1	0.64	LILRB1	0.78	CD163					CTSS	0.7
MT2A	0.57	QSOX1	0.48	FAM167A			TAP2	0.63	IL2RA	0.78	CD209					C1QC	0.7
MYH9	0.57	F3	0.48	FEM1C			NCKAP1L	0.63	TLR4	0.78	CD226					MPEG1	0.7
RUNX1-IT1	0.57	ETS1	0.48	FHL2			LILRB1	0.63	LILRB4	0.78	PD-L1					SAMSN1	0.7
SP110	0.57	CDC42EP1	0.48	FILIP1L			IL2RA	0.63	GBP5	0.78	CD40					MS4A6A	0.7
TNIP1	0.57	SLC39A13	0.47	FLNA			GBP5	0.63	CD84	0.78	CD44					FCGR1B	0.7
CST6	0.56	C11orf68	0.47	FLNC			FCER1G	0.63	CCR5	0.78	CD53					HLA-DMB	0.7
RBMS2	0.56	STK10	0.47	FLVCR1			CD84	0.63	FYB1	0.78	CD70					GIMAP6	0.7
ARHGAP29	0.55	ZFP36L1	0.47	FOSL1			C1QB	0.63	2019-03-01	0.77	CD72					EVI2A	0.7
DCBLD2	0.55	PLAUR	0.47	FRMD6			PTPRC	0.62	CALHM6	0.77	CD80					IL12RB1	0.7
EVA1A	0.55	FLNA	0.47	FXYD5			LAIR1	0.62	CXCL10	0.77	CD84					LAPTM5	0.7
FLII	0.55	ADAMTS6	0.47	GADD45A			JAK2	0.62	FCGR1A	0.77	CD86					NCKAP1L	0.7
FUT8	0.55	CD59	0.46	HOMER3			IRF1	0.62	C1QB	0.77	CGAS					ICOS	0.7
RAB11FIP5	0.55	DPP9	0.46	KBTBD7			IL21R	0.62	FCER1G	0.77	CMKLR1					IGSF6	0.69
RASA1	0.55	SERPINB7	0.46	KIF21A			IL15RA	0.62	CYTH4	0.77	CMPK2					CD86	0.69
BLID	0.54	FAM214B	0.46	KIAA0319			GBP4	0.62	PLEKHO2	0.77	CNTLN					CCL4	0.69
C3orf52	0.54	KRTAP2-3	0.46	KIAA1462			CYTH4	0.62	WIPF1	0.77	CORO1C					C1QB	0.69
CDC42EP3	0.54	SMURF2	0.46	KRT34			CXCL10	0.62	LAIR1	0.77	CRTAM					CXCR6	0.69
FEM1C	0.54	ARHGAP22	0.46	KRTAP2-3			CD163	0.62	EVI2A	0.77	CRYBG1					LAIR1	0.69
FRMD5	0.54	AXL	0.46	LAYN			AOAH	0.62	GBP4	0.77	CSF1R					P2RY10	0.69
NT5E	0.54	LOX	0.46	LOC100126784			AIM2	0.62	FGL2	0.77	CSF2RB					CRTAM	0.69
QSOX1	0.54	C15orf52	0.46	LOX			TAP1	0.61	C1QA	0.76	CTSB					HLA-DRA	0.69
SH3KBP1	0.54	DSE	0.46	LUZP1			STAT1	0.61	CD80	0.76	CTSC					CLEC6A	0.68
SPATS2L	0.54	FLNC	0.46	MAP2			SIGLEC9	0.61	FCGR1B	0.76	CXCL10					MARCH1	0.68
ZFP36L1	0.54	ABLIM3	0.46	MGLL			PTPN22	0.61	AIF1	0.76	CXCL11					SIGLEC7	0.68
ANKRD13A	0.53	LAYN	0.46	MICAL2			PSMB9	0.61	SCIMP	0.76	CXCL9					CD2	0.68
CD109	0.53	EVA1A	0.45	MIR155HG			PPP1R18	0.61	CMKLR1	0.76	CXCR2P1					CCR1	0.68
CSF2	0.53	LUZP1	0.45	MT2A			LILRB4	0.61	IL21R	0.76	CYBB					CCR5	0.68
FAM129B	0.53	TRIO	0.45	MTERFD3			ICOS	0.61	PILRA	0.76	CYTH4					GIMAP5	0.68
GBP3	0.53	UBE2Z	0.45	MYH9			GPR84	0.61	CD226	0.76	DAPP1					SIGLEC10	0.68
PPP2R3A	0.53	FAM129B	0.45	NDRG2			CSF2RB	0.61	PD-L1	0.76	DDX60					FCGR1CP	0.68
RGS10	0.53	TLDC1	0.45	NEK6			C1QA	0.61	CCL4	0.75	DOCK11					HLA-DPA1	0.68
ROR1	0.53	PARVA	0.45	NEXN			APOL3	0.61	GIMAP5	0.75	DSE					MNDA	0.68
ACO1	0.52	PML	0.45	NGF			WARS	0.6	LPXN	0.75	EHD4					MS4A4A	0.68
ARHGAP10	0.52	NT5E	0.45	NT5E			UBE2L6	0.6	CSF2RB	0.75	ELK3					SH2D1A	0.68
BCL10	0.52	MXRA7	0.45	PD-L1			SNX20	0.6	IL10RA	0.75	EPSTI1					CD3G	0.68
COL13A1	0.52	CYR61	0.45	PD-L2			SIGLEC10	0.6	MPEG1	0.75	ESYT1					CD28	0.68
ELK3	0.52	EMP1	0.45	PDLIM4			SCIMP	0.6	HSD11B1	0.75	FAM225B					AIF1	0.67
ENC1	0.52	GADD45A	0.45	PDLIM7			MCUB	0.6	FCGR1CP	0.74	FAS					RNASE6	0.67
FLJ23867	0.52	NEXN	0.44	PEA15			MARCH1	0.6	IGSF6	0.74	FASLG					LILRB2	0.67
MPRIP	0.52	ADAM19	0.44	PICALM			LRRC25	0.6	MS4A4A	0.74	FCER1G					FCGR2A	0.67
ABLIM3	0.51	SMTN	0.44	PIR			IL2RB	0.6	MAFB	0.74	FCGR1A					C1QA	0.67
ADORA2B	0.51	ARHGEF28	0.44	PLAU			HK3	0.6	CLEC4A	0.74	FCGR1B					CXORF21	0.67
C15orf52	0.51	NGF	0.44	PLAUR			FAS	0.6	SAMHD1	0.74	FCGR1CP					SRGN	0.67
CDCP1	0.51	PTPLAD2	0.44	PLIN3			CRYBG1	0.6	CD4	0.74	FCGR2A					LILRB1	0.67
CYR61	0.51	KRT34	0.44	PML			CD226	0.6	SIGLEC10	0.74	FCGR2C					SLCO2B1	0.67
DNAH5	0.51	GAS6	0.44	PPP1R18			APOL6	0.6	CD163	0.74	FCGR3A					RGS18	0.67
ERRFI1	0.51	COL6A1	0.44	PPP2R3A			RIC1	0.59	SASH3	0.74	FKBP15					IL10RA	0.67
ETS1	0.51	DRAP1	0.44	PTPLAD1			PIP4K2A	0.59	EVI2B	0.74	FPR1					CD48	0.67
G0S2	0.51	TNIP1	0.44	PTPLAD2			P2RX7	0.59	CLEC6A	0.74	FPR3					TRAT1	0.67
MET	0.51	CD151	0.43	PXN-AS1			MNDA	0.59	SLC1A3	0.74	GAL3ST4					CD226	0.67
PELO	0.51	NAV3	0.43	QSOX1			LAP3	0.59	CRTAM	0.73	GBP1					LYZ	0.67
PLIN3	0.51	RIN3	0.43	RAB11FIP5			GBP2	0.59	GIMAP6	0.73	GBP2					ITK	0.67
PXN	0.51	PPP2R3A	0.43	RAC2			FCGR1A	0.59	SNX20	0.73	GBP4					SASH3	0.67
SH3RF1	0.51	FXYD5	0.43	RAVER2			CSF1R	0.59	LRRC25	0.73	GBP5					IL21R	0.67
SLFN5	0.51	SERPINB8	0.43	RIN3			CRTAM	0.59	LCP1	0.73	GIMAP4					ABCD2	0.66
SPOCD1	0.51	HLA-E	0.43	RMND5A			CALHM6	0.59	SIGLEC9	0.73	GIT2					CD300LF	0.66
TNFAIP3	0.51	MIR155HG	0.43	SAMD9L			TAGAP	0.58	ICOS	0.73	GJD3					SLAMF7	0.66
ZNF185	0.51	MGLL	0.43	SEMA7A			STK10	0.58	FERMT3	0.73	GLIPR1					CD4	0.66
CAMTA2	0.5	SLC9A7	0.42	SERPINB7			RAC2	0.58	SIGLEC7	0.73	GNA13					SLA2	0.66
ERO1L	0.5	HYI	0.42	SFXN3			MS4A6A	0.58	CCR1	0.73	GNAI2					SIGLEC9	0.66
GPR39	0.5	FAM65A	0.42	SH3BGRL3			MAFB	0.58	GLIPR1	0.73	GNGT2					PLA2G7	0.66
HDAC7	0.5	UBA7	0.42	SH3KBP1			FCGR1CP	0.58	TRPV2	0.73	GPATCH11					CYTH4	0.66
HRH1	0.5	BOK	0.42	SLC43A3			FCGR1B	0.58	HCK	0.73	GPATCH2L					EVI2B	0.66
KRT19	0.5	MAP7D1	0.42	SLC9A7			DSE	0.58	MNDA	0.72	GPR84					GPR174	0.66
MAN2A1	0.5	PLAU	0.42	SMURF2			CASP5	0.58	CD14	0.72	GPRC5C					GPR34	0.66
MIEF2	0.5	PPP1R15A	0.42	SPAST			ZNF267	0.57	CSF1R	0.72	GRB2					SLA	0.66
PPARD	0.5	SAMD9L	0.42	SPIRE2			NLRC5	0.57	SLC7A7	0.72	GZMB					WIPF1	0.66
PTPLAD2	0.5	ENG	0.42	SPOCD1			LCP1	0.57	SH2D1A	0.72	HAPLN3					BTK	0.66
RALB	0.5	CCDC80	0.42	STK10			IL15	0.57	SLCO2B1	0.72	HAVCR2					GZMK	0.65
SH3RF2	0.5	COL13A1	0.42	SYNJ2			FPR1	0.57	DOCK2	0.72	HID1					CD14	0.65
TMEM71	0.5	COL6A2	0.42	TLDC1			DAPP1	0.57	SLA	0.72	HK3					CD96	0.65
ARNTL2	0.49	ANTXR2	0.42	TLE6			CXCL9	0.57	STX11	0.72	ICOS					TNFAIP8L2	0.65
BCAR3	0.49	SOCS3	0.41	TMEM106A			CFLAR	0.57	SIRPA	0.72	IFI16					CLEC4A	0.65
ERAP2	0.49	SYNJ2	0.41	TNFRSF12A			VSIG4	0.56	TAGAP	0.72	IFIT3					LAP3	0.65
KRT34	0.49	PDLIM4	0.41	TNIP1			SLCO2B1	0.56	CD68	0.72	IFNG					PILRA	0.65
KRT7	0.49	TRIM8	0.41	TRIM8			SAMD9	0.56	BIN2	0.72	IL12RB1					CD8A	0.65
KRTAP2-3	0.49	ARHGAP10	0.41	TRIO			GIMAP4	0.56	CXCL11	0.72	IL15					GBP1	0.65
LUZP1	0.49	TRIP6	0.41	TRIP6			FCGR2A	0.56	TNFRSF9	0.72	IL15RA					CXCL9	0.65
NAT1	0.49	SEC14L1	0.41	UAP1			DOCK11	0.56	CXCL9	0.71	IL18R1					SELPLG	0.65
OCIAD2	0.49	ACTB	0.41	UNKL			CXCL11	0.56	CXCR6	0.71	IL21R					TLR7	0.65
PICALM	0.49	NOTCH2	0.41	ZFP36L1			CMKLR1	0.56	JAK2	0.71	IL27					ARHGAP15	0.65
PIP4K2A	0.49	MT2A	0.41	ZSWIM5			TBX21	0.55	BTK	0.71	IL2RA					SCIMP	0.65
SUSD1	0.49	LTBP2	0.41				SH2B3	0.55	B2M	0.71	IL2RB					CD3D	0.65
TMEM106A	0.49	ITGA5	0.41				IL27	0.55	P2RX7	0.71	IRF1					CCR8	0.65
TMEM154	0.49	SLC43A3	0.41				IFNG	0.55	APOL3	0.71	JAK2					GBP4	0.65
TNC	0.49	TMEM106A	0.41				FCGR2C	0.55	SIRPB2	0.71	KLRD1					SNX20	0.65
TSPAN5	0.49	EHD1	0.41				ADAP2	0.55	HCST	0.71	LAIR1					GPR183	0.65
AFAP1-AS1	0.48	NEK6	0.41				TNFAIP3	0.54	TNFSF8	0.71	LAP3					PLXNC1	0.65
DDX60L	0.48	FST	0.41				TCAF2	0.54	FCGR2C	0.7	LCP1					MSR1	0.65
ELFN2	0.48	PLIN3	0.41				SLA2	0.54	THEMIS	0.7	LCP2					CD3E	0.65
GNA15	0.48	SPHK1	0.4				KLRD1	0.54	PTPN7	0.7	LHFPL2					ZEB2	0.65
HMGA1	0.48	TUBB6	0.4				IFIT3	0.54	DOK2	0.7	LILRA1					VSIG4	0.65
LAMB3	0.48	PICALM	0.4				HAPLN3	0.54	CD3G	0.7	LILRA3					SLAMF1	0.65
LRRN4	0.48	SFXN3	0.4				FASLG	0.54	PTAFR	0.7	LILRB1					CD163	0.65
ME3	0.48	MOK	0.4				EPSTI1	0.54	PIK3CG	0.7	LILRB2					MS4A7	0.65
NABP1	0.48	KIAA1462	0.4				CORO1C	0.54	IL2RB	0.7	LILRB4					P2RY13	0.64
NRP1	0.48	2018-03-04	0.4				CCL3	0.54	IRF8	0.7	LNPEP					GIMAP2	0.64
SAMD4A	0.48	FEM1C	0.4				PDCD1	0.53	ZEB2	0.7	LOC154761					HCST	0.64
TGFBI	0.48	KRT33B	0.4				MPP1	0.53	BCL2A1	0.7	LRRC25					TMEM150B	0.64
TLDC1	0.48	ARF4	0.4				MDFIC	0.53	DSE	0.7	LUZP6					CSF1R	0.64
TNFRSF12A	0.48	SH3KBP1	0.4				GZMB	0.53	TMEM140	0.7	LYPD5					NKG7	0.64
TRIM8	0.48	ABL2	0.4				FKBP15	0.53	GBP1P1	0.7	LZTS3					PRF1	0.64
ACSL5	0.47	SNX33	0.4				DDX60	0.53	SELPLG	0.7	MAFB					TYROBP	0.64
C19orf33	0.47	FOXO3	0.4				CD72	0.53	GPR141	0.7	MAN2A1					GIMAP7	0.64
CD59	0.47	FHL2	0.4				CD209	0.53	LAP3	0.69	MAP7D3					CCR2	0.64
CTSS	0.47	DCBLD2	0.4				CCL8	0.53	CD72	0.69	MCOLN2					LRRC25	0.64
DDX60	0.47	COL5A1	0.4				TGFBI	0.52	FCGR2B	0.69	MCUB					HLA-DPB1	0.64
DPP9	0.47	GPR176	0.4				MICB	0.52	VSIG4	0.69	MDFIC					ITGB2	0.64
FGD6	0.47	TRIM22	0.4				LOC154761	0.52	CD209	0.69	MFSD1					CD247	0.64
GPR116	0.47	LOC100126784	0.4				LILRA1	0.52	CCR2	0.69	MICB					DOCK2	0.64
GRAMD3	0.47	EPT1	-0.4				IFI16	0.52	GPR84	0.69	MMP15					B2M	0.63
HERC6	0.47	ARHGEF39	-0.4				GLIPR1	0.52	CD2	0.69	MNDA					IFI30	0.63
HIF1A	0.47	CCDC121	-0.4				CXCR2P1	0.52	CLEC4D	0.69	MOB1A					PYHIN1	0.63
IKBKE	0.47	TMPO	-0.4				BATF2	0.52	PSMB9	0.69	MPP1					GZMA	0.63
KCNN4	0.47	UNKL	-0.4				APOBEC3G	0.52	NCF1	0.69	MS4A6A					TAGAP	0.63
LY96	0.47	CYC1	-0.4				MYO5A	0.51	SAMD3	0.69	MYD88					CD74	0.63
MAMLD1	0.47	COX6C	-0.4				MFSD1	0.51	CD247	0.69	MYO5A					CCL8	0.63
MIR155HG	0.47	KIAA0319	-0.41				MCOLN2	0.51	CD244	0.69	NBN					SIRPB2	0.63
MT1F	0.47	DDX23	-0.41				GNAI2	0.51	AP1S2	0.69	NCKAP1L					HLA-DQA1	0.63
MT4	0.47	TBC1D31	-0.41				ESYT1	0.51	WAS	0.69	NCR1					HSD11B1	0.63
MYOF	0.47	TMEM106C	-0.41				CTSC	0.51	IL4I1	0.69	NLRC5					CST7	0.63
P4HA2	0.47	C12orf73	-0.41				CTSB	0.51	TIGIT	0.69	NTAN1					SIRPG	0.63
PLAT	0.47	TPD52	-0.41				TRIM14	0.5	RAB8B	0.69	NUB1					CD33	0.63
PML	0.47	KIAA1598	-0.41				MYD88	0.5	SRGN	0.69	OPTN					FLI1	0.63
PPP1R18	0.47	NDRG2	-0.41				GNA13	0.5	CD200R1	0.68	P2RX7					IL7R	0.63
PTPRE	0.47	PTPLAD1	-0.41				ELK3	0.5	P2RY13	0.68	PARP12					CYTIP	0.63
SERPINB7	0.47	SLC25A45	-0.41				CNTLN	0.5	APOBEC3G	0.68	PD-1					DOCK10	0.63
TGFA	0.47	RAD54B	-0.41				CCL4L1	0.5	TIFAB	0.68	PD-L2					TRPV2	0.63
TJP1	0.47	ANKRD46	-0.41				CCDC88A	0.5	FPR1	0.68	PI4K2A					PIK3AP1	0.63
TRIM38	0.47	FAM117B	-0.41				TMEM106A	0.49	KLRD1	0.68	PIK3AP1					LAT2	0.63
VEGFA	0.47	KBTBD7	-0.42				STK17A	0.49	RGS18	0.68	PIP4K2A					TIFAB	0.62
AIM2	0.46	GTF3C2	-0.42				RASSF4	0.49	SLAMF7	0.68	PLAU					FCGR2B	0.62
CDC42EP1	0.46	SASS6	-0.42				RASAL2	0.49	STAT1	0.68	PLEK					CD300A	0.62
DAPP1	0.46	MTERFD3	-0.43				RASA2	0.49	SIRPG	0.68	PPP1R18					FOLR2	0.62
DYSF	0.46	RAVER2	-0.43				RALB	0.49	NCF2	0.68	PSMB9					ABI3	0.62
ERBB2IP	0.46	MAP2	-0.43				GRB2	0.49	SLAMF1	0.68	PTAFR					GNGT2	0.62
EZR	0.46	IMPA2	-0.43				GJD3	0.49	PYHIN1	0.68	PTPN22					EPSTI1	0.62
FHL2	0.46	GATS	-0.43				CD40	0.49	PCED1B-AS1	0.68	PTPRC					SLC31A2	0.62
FUT8-AS1	0.46	ENO3	-0.43				C10ORF55	0.49	TLR7	0.68	RAB40B					CXCR3	0.62
GADD45A	0.46	CCDC163P	-0.43				STAMBPL1	0.48	MSR1	0.68	RAC2					GZMH	0.62
GPR115	0.46	CHRNA5	-0.43				SLC9A7	0.48	GZMA	0.68	RALB					GMFG	0.62
IFIT3	0.46	CBX2	-0.44				RANBP6	0.48	ABCD2	0.68	RASA2					CD300C	0.62
MAP4K5	0.46	ACACB	-0.44				PLAU	0.48	NFAM1	0.68	RASSF4					LHFPL2	0.62
NEK6	0.46	DCLRE1A	-0.45				LYPD5	0.48	CCL5	0.68	RECQL					APOL6	0.62
PEA15	0.46	DSCC1	-0.45				LNPEP	0.48	CD300C	0.68	RGS10					IL2RG	0.62
PLAG1	0.46	SPAST	-0.45				GAL3ST4	0.48	ARHGEF6	0.68	RIC1					HLA-DRB1	0.62
SERPINA1	0.46	RMND5A	-0.45				CCDC71L	0.48	P2RY10	0.68	SAMD9					ARHGEF6	0.62
SH3BGRL3	0.46	E2F2	-0.45				RECQL	0.47	EMILIN2	0.68	SAMD9L					GAB3	0.62
SLC25A37	0.46	PDE7A	-0.46				PARP12	0.47	IL7R	0.68	SAMHD1					GPR171	0.62
SMAD3	0.46	PXN-AS1	-0.46				NUB1	0.47	LCK	0.68	SCIMP					FCGR2C	0.61
TMEM173	0.46	ASRGL1	-0.47				LILRA3	0.47	LILRB3	0.68	SH2B3					LPXN	0.61
TMEM51	0.46	TLE6	-0.47				IL18R1	0.47	IKZF1	0.68	SIGLEC10					FASLG	0.61
TMOD3	0.46	ZSWIM5	-0.47				IDS	0.47	RCSD1	0.68	SIGLEC9					TIGIT	0.61
UPP1	0.46	RBM12B	-0.47				ATP10A	0.47	GIMAP2	0.67	SLA2					TMEM176B	0.61
BCL2A1	0.45	RALGAPA1	-0.47				ZYX	0.46	PTPRO	0.67	SLAMF8					FPR1	0.61
C11orf68	0.45	PIR	-0.48				TLR1	0.46	IL10	0.67	SLC22A23					GPRIN3	0.61
CASP4	0.45	FLVCR1	-0.48				TICAM2	0.46	RNASE6	0.67	SLC31A2					DOCK8	0.61
DUSP10	0.45	TACC2	-0.49				PML	0.46	CTSB	0.67	SLCO2B1					RGS1	0.61
EHD1	0.45	KIF21A	-0.51				OPTN	0.46	UBE2L6	0.67	SNX20					CCL5	0.6
EVI2A	0.45	ATAD2B	-0.51				NCR1	0.46	TRAT1	0.67	STAMBPL1					GPR84	0.6
FLNC	0.45	SPIRE2	-0.52				MAP7D3	0.46	CD300A	0.67	STAT1					DOK2	0.6
IDS	0.45	ACTR6	-0.52				GPATCH11	0.46	ABI3	0.67	STK10					RASSF4	0.6
IL31RA	0.45						CD44	0.46	EPSTI1	0.67	STK17A					MILR1	0.6
LAYN	0.45						CD109	0.46	CD3D	0.67	TAGAP					CCRL2	0.6
LIF	0.45						AXL	0.46	GPR174	0.67	TAP1					TMEM140	0.6
LIMK1	0.45						TIPARP	0.45	TAP1	0.67	TAP2					SPI1	0.6
RIN3	0.45						RNF213	0.45	TYROBP	0.67	TCAF2					CD209	0.6
SFXN3	0.45						GNGT2	0.45	CYSLTR2	0.67	TFEC					TNFRSF1B	0.6
SLC38A9	0.45						FAM225B	0.45	ITK	0.67	TGFBI					HLA-DMA	0.6
STK17B	0.45						CD70	0.45	PLXNC1	0.67	TICAM2					CSF2RA	0.6
WFDC3	0.45						APOBEC3C	0.45	SPI1	0.67	TLR1					LY86	0.6
ABR	0.44						ANXA1	0.45	CD28	0.67	TLR8					GBP5	0.6
ADRB2	0.44						UBA6	0.44	CD48	0.67	TMEM106A					IL2RB	0.6
APOL6	0.44						TSC22D2	0.44	LOC653653	0.67	TNFAIP3					BIN2	0.6
CATSPER1	0.44						RGS10	0.44	HAPLN3	0.67	TNFRSF9					UBASH3A	0.6
DTX3L	0.44						NRP2	0.44	LILRA6	0.67	TNFSF13B					NLRC4	0.6
EXPH5	0.44						MAN2A1	0.44	CASP5	0.66	TUBB6					ITGB7	0.59
FBXO32	0.44						GIT2	0.44	HLA-DMB	0.66	UBE2L6					RAB33A	0.59
FXYD5	0.44						EHD4	0.44	C10ORF128	0.66	VSIG4					LST1	0.59
GALNT5	0.44						DTX3L	0.44	CD33	0.66	WARS					LILRA6	0.59
GPR87	0.44						DDX60L	0.44	IRF1	0.66	ZNF267					GZMB	0.59
GPRC5A	0.44						DCLRE1B	0.44	SLA2	0.66	ZYX					P2RX7	0.59
ICAM1	0.44						DCBLD2	0.44	GAL3ST4	0.66						CASP5	0.59
IRF9	0.44						BICD1	0.44	RAC2	0.66						KMO	0.59
ITGB2	0.44						BEND6	0.44	GMFG	0.66						KLRK1	0.59
LMNA	0.44						BATF3	0.44	CASP1	0.66						SAMHD1	0.59
LOC100126784	0.44						ATG7	0.44	NKG7	0.66						GPSM3	0.59
LOC728730	0.44						ANO6	0.44	HLA-E	0.66						CD68	0.59
MIR100HG	0.44						TMEM131L	0.43	GZMK	0.66						EOMES	0.59
NAV2	0.44						RHBDF2	0.43	ARHGAP25	0.66						PLEKHO2	0.59
P2RY2	0.44						PMAIP1	0.43	ITGB7	0.66						TNFSF4	0.59
PARP12	0.44						PLGRKT	0.43	IL15RA	0.66						TM6SF1	0.59
PDLIM4	0.44						PI4K2A	0.43	ITGB2	0.66						CD69	0.59
SAMD9L	0.44						HDX	0.43	PSTPIP1	0.66						ARHGAP18	0.59
STC2	0.44						GPATCH2L	0.43	BTN3A3	0.66						CCL4L1	0.58
SYNJ2	0.44						CGAS	0.43	SIT1	0.66						CCL3	0.58
SYTL3	0.44						AKAP2	0.43	STK10	0.66						SNX10	0.58
TMEM171	0.44						STAC	0.42	LRRC8C	0.66						PLA2G2D	0.58
TMEM92	0.44						SPATS2L	0.42	ARHGAP15	0.66						CLEC4D	0.58
TRIP10	0.44						SMURF2	0.42	NLRP3	0.66						CALHM6	0.58
TTC9C	0.44						RIPK2	0.42	MYO1F	0.66						BTN3A1	0.58
ZBED2	0.44						NTAN1	0.42	SLC2A9	0.66						ENTPD1	0.58
ADK	0.43						NBN	0.42	PTPN22	0.66						DNAJC5B	0.58
ARAP2	0.43						MOB3A	0.42	GLIPR2	0.66						NCF4	0.58
ARHGEF18	0.43						MOB1A	0.42	SIGLEC5	0.66						LILRB3	0.58
BCL9L	0.43						LUZP6	0.42	SNX10	0.65						NLRP3	0.58
BTN3A3	0.43						HIF1A	0.42	CLEC10A	0.65						NFAM1	0.58
CCDC71L	0.43						GLS	0.42	CD8A	0.65						C10ORF128	0.58
CCND1	0.43						EHD1	0.42	GIMAP7	0.65						TNFSF12-TNFSF13	0.58
CFLAR-AS1	0.43						CMPK2	0.42	TNFAIP8L2	0.65						SH2B3	0.58
DUSP5	0.43						CDCP1	0.42	NCF1C	0.65						THEMIS2	0.58
EHD4	0.43						ARNTL2	0.42	SH2B3	0.65						CLEC4E	0.57
FLNA	0.43						TUBB6	0.41	LHFPL2	0.65						LCP1	0.57
GJB3	0.43						ROR1	0.41	IFI30	0.65						CXCR2P1	0.57
GTPBP2	0.43						NIPAL4	0.41	HK3	0.65						LAG3	0.57
HSPG2	0.43						EREG	0.41	MFSD1	0.65						LIPA	0.57
IFFO2	0.43						BCL10	0.41	FAM78A	0.65						BTN3A3	0.57
IFI44	0.43						LYN	0.4	ARHGAP30	0.65						APOL3	0.57
LOC152225	0.43						GNA12	0.4	CD3E	0.65						TLR1	0.57
LOX	0.43						RAB4A	-0.41	GNB4	0.65						FOXP3	0.57
NPC2	0.43						PNKD	-0.41	CCR8	0.65						ADORA3	0.57
OSMR	0.43						SLC22A23	-0.43	ITGAL	0.65						KLRB1	0.57
PDLIM7	0.43						LZTS3	-0.43	ITGA4	0.65						PCED1B-AS1	0.57
PLEK2	0.43						MMP15	-0.46	EMP3	0.65						SAMD3	0.57
C9orf46	0.43						GPRC5C	-0.46	MPP1	0.65						C19ORF38	0.57
PVR	0.43						C11ORF49	-0.46	CYTIP	0.65						IGFLR1	0.56
SGMS2	0.43						HID1	-0.47	GM2A	0.65						STAT1	0.56
SH2D4A	0.43						RAB40B	-0.48	PTGER4	0.65						C1ORF54	0.56
TACSTD2	0.43								SIRPB1	0.65						PDE4B	0.56
TLR2	0.43								SLC15A3	0.65						ARHGDIB	0.56
TMBIM1	0.43								IL2RG	0.65						TRIM22	0.56
UBA6	0.43								CLEC4E	0.65						SGTB	0.56
VSIG1	0.43								CCL8	0.64						HLA-B	0.56
ALCAM	0.42								FCGR2A	0.64						IL9R	0.56
ALDH1A3	0.42								CTSS	0.64						ADAP2	0.56
AMPD3	0.42								HLA-DRA	0.64						NR1H3	0.55
ANTXR2	0.42								IL15	0.64						IL18BP	0.55
ARHGEF28	0.42								LAT2	0.64						STK17B	0.55
CAP1	0.42								TAP2	0.64						P2RY14	0.55
CAST	0.42								SIGLEC14	0.64						GLIPR2	0.55
CFLAR	0.42								EOMES	0.64						TPK1	0.55
COL4A3BP	0.42								KBTBD8	0.64						IL4I1	0.55
CTNNAL1	0.42								LTA	0.64						PLCL2	0.55
DGKA	0.42								TMEM150B	0.64						CEACAM21	0.55
ECE1	0.42								HLA-B	0.64						ANKRD44	0.55
FRMD6	0.42								NLRC4	0.64						TMEM106A	0.54
GBP1	0.42								SLAMF6	0.64						IRF1	0.54
KCNK6	0.42								ITGAM	0.64						PTGDR	0.54
LINC00460	0.42								GNG2	0.64						RAB8B	0.54
MAML2	0.42								CD180	0.64						CDC42SE2	0.54
MCL1	0.42								DOCK11	0.64						ARHGAP25	0.54
NFKBIZ	0.42								BMP2K	0.64						LILRA5	0.54
NMI	0.42								PRF1	0.64						HEXB	0.54
PMAIP1	0.42								RAB33A	0.64						SLC15A3	0.54
PTTG1IP	0.42								MEFV	0.64						CLEC10A	0.53
RLN2	0.42								GPR34	0.63						ARL6IP5	0.53
SLC2A1	0.42								TLR1	0.63						PPM1M	0.53
SLC43A3	0.42								MIR155HG	0.63						IL15	0.53
SLC9A7	0.42								HLA-DPA1	0.63						IFNG	0.53
SNX18	0.42								EBI3	0.63						CCL13	0.53
SPCS3	0.42								FGD2	0.63						GJD3	0.53
TAP2	0.42								STAT5A	0.63						HLA-DQB1	0.53
TPBG	0.42								GZMH	0.63						RIC1	0.52
UAP1	0.42								PPP1R18	0.63						GYPC	0.52
UGCG	0.42								SLC9A9	0.63						NAIP	0.52
ABL2	0.41								GBP2	0.63						UBE2L6	0.52
CAPG	0.41								TRAF3IP3	0.63						GNLY	0.52
CD47	0.41								GZMB	0.63						FAS	0.52
CLTB	0.41								MS4A7	0.63						LILRA1	0.52
CTNNA1	0.41								GJD3	0.63						GLRX	0.52
DDX47	0.41								CTLA4	0.63						SLC2A5	0.52
DNMBP	0.41								PLXDC2	0.63						GPR82	0.51
EMP1	0.41								PREX1	0.63						IFIT5	0.5
HIVEP2	0.41								PIK3R5	0.63						CLEC12A	0.5
HLA-B	0.41								FGR	0.63						TRIM21	0.5
HOMER3	0.41								C19ORF38	0.63						IL18RAP	0.5
HS3ST1	0.41								AIM2	0.63						IL27	0.49
IFI16	0.41								ADGRE1	0.63						FGR	0.49
IFIT2	0.41								SLC37A2	0.63						CREBL2	0.49
IL32	0.41								CCL3	0.62						MMP12	0.48
MBOAT2	0.41								ADAMDEC1	0.62						FUCA1	0.48
NCEH1	0.41								SLC8A1	0.62						IL15RA	0.48
NEXN	0.41								FASLG	0.62						LILRA3	0.48
S100A2	0.41								IFNG	0.62						ZNF101	0.48
SAMD9	0.41								CD40	0.62						PLGRKT	0.47
SDC4	0.41								IL18BP	0.62						ICAM2	0.47
SFTA1P	0.41								BTN3A1	0.62						BMS1P20	0.46
SIPA1L1	0.41								SAMD9L	0.62						RANBP6	0.46
SLC44A2	0.41								CALHM2	0.62						GPR31	0.46
STK10	0.41								PDCD1	0.62						FCN1	0.45
THEMIS2	0.41								GFI1	0.62						ITGAE	0.44
TINAGL1	0.41								ARHGAP9	0.62						LGALS2	0.44
TJP2	0.41								C1ORF162	0.62						SP100	0.43
TMC5	0.41								FMNL3	0.62						PSME1	0.42
TRIP6	0.41								CLEC12A	0.62						AZI2	0.42
TSC22D2	0.41								TNFAIP3	0.62						CCL3L1	0.4
VASN	0.41								FOXP3	0.62						FAM83H	-0.41
AXL	0.4								IL16	0.62
BNIP3L	0.4								FLI1	0.62
C1orf116	0.4								GVINP1	0.62
CALM2	0.4								VCAM1	0.62
CLCF1	0.4								SERPING1	0.62
DMKN	0.4								HPS5	0.62
DTX2	0.4								CD300LF	0.62
EXT1	0.4								SP140	0.62
FAM167A	0.4								GPNMB	0.62
FBXL2	0.4								IL27	0.61
FNDC3B	0.4								FOLR2	0.61
FRYL	0.4								PLA2G2D	0.61
GPR110	0.4								GGTA1P	0.61
HBEGF	0.4								CXCR2P1	0.61
HLA-C	0.4								LACTB	0.61
ICAM2	0.4								ADAP2	0.61
LIPG	0.4								CLEC7A	0.61
LOC374443	0.4								ATP8B4	0.61
MBNL1	0.4								TNFAIP8	0.61
MILR1	0.4								STAC3	0.61
NDEL1	0.4								APBB1IP	0.61
NGF	0.4								GIMAP1	0.61
PAWR	0.4								LST1	0.61
RAMP1	0.4								RTN1	0.61
SERPINB1	0.4								DOCK8	0.61
SLC20A1	0.4								NPL	0.61
SLFN12	0.4								GNGT2	0.61
STAP2	0.4								DNAJC5B	0.61
THBS1	0.4								ETS1	0.61
TMEM159	0.4								SERPINB9	0.61
TMPRSS11E	0.4								CLEC2B	0.61
TNFRSF9	0.4								ITPRIPL1	0.61
TRIM25	0.4								CHST11	0.61
ACO2	-0.4								CCL4L1	0.6
ATAD2B	-0.4								SGTB	0.6
CCDC121	-0.4								ZNF267	0.6
CELSR2	-0.4								C1ORF54	0.6
CNPY4	-0.4								NRROS	0.6
COX7B	-0.4								LILRA1	0.6
CPLX2	-0.4								KLRK1	0.6
CYC1	-0.4								APOL6	0.6
DTNB	-0.4								UBASH3A	0.6
FANCC	-0.4								EPB41L2	0.6
FZD1	-0.4								CORO1A	0.6
HIGD1A	-0.4								CD6	0.6
HNRNPA0	-0.4								LILRB5	0.6
HSBP1	-0.4								GRIN3A	0.6
KLHL15	-0.4								PLA2G7	0.6
LOC401068	-0.4								APOL4	0.6
NDUFA4	-0.4								WARS	0.6
PI15	-0.4								GPR183	0.6
RHBDD3	-0.4								CD69	0.6
SCML2	-0.4								CAMK4	0.6
TTC32	-0.4								CD37	0.6
C15orf59	-0.41								ADAM19	0.6
CABYR	-0.41								FPR2	0.6
COX5A	-0.41								PTGS1	0.6
DPYSL4	-0.41								XCL2	0.59
GNAL	-0.41								PLEKHO1	0.59
HDAC4	-0.41								F13A1	0.59
HES6	-0.41								CR1	0.59
HOXC9	-0.41								MCOLN2	0.59
JAGN1	-0.41								AXL	0.59
KIAA0319	-0.41								HCP5	0.59
KIF21A	-0.41								NCF1B	0.59
MAP2	-0.41								LILRA5	0.59
MAZ	-0.41								DOCK10	0.59
NPL	-0.41								DCANP1	0.59
SARM1	-0.41								FAM49A	0.59
SEMA6A	-0.41								HLA-DOA	0.59
SPHAR	-0.41								C1R	0.59
TMEM237	-0.41								CPVL	0.59
ACAA2	-0.42								SIGLEC1	0.59
APOO	-0.42								TNFSF4	0.59
C2orf44	-0.42								BTLA	0.59
ENAH	-0.42								SPN	0.59
HDDC2	-0.42								KCNAB2	0.59
HR	-0.42								C5AR1	0.59
MAPT	-0.42								KLHL6	0.59
MPC2	-0.42								CD5	0.59
NENF	-0.42								KCNMA1	0.59
NFYB	-0.42								CORO1C	0.58
SBNO1	-0.42								TICAM2	0.58
UNKL	-0.42								ATP6V1B2	0.58
ZBTB39	-0.42								OSTM1	0.58
ZSWIM5	-0.42								MCUB	0.58
C15orf61	-0.43								IL18RAP	0.58
DLX5	-0.43								MRC1	0.58
DUSP19	-0.43								HVCN1	0.58
FAM222A	-0.43								DAB2	0.58
FLYWCH2	-0.43								FAS	0.58
HEY2	-0.43								HLA-DQA1	0.58
HOXC10	-0.43								AGAP2	0.58
HOXC6	-0.43								HLA-DPB1	0.58
LRRC28	-0.43								CARD16	0.58
MC1R	-0.43								TNFRSF1B	0.58
NAIF1	-0.43								LIPA	0.58
NFATC3	-0.43								TESPA1	0.58
PREB	-0.43								RUBCNL	0.58
R3HDM2	-0.43								PRKCB	0.58
RIMKLA	-0.43								GYPC	0.58
TMEM37	-0.43								ZBED2	0.58
TUBA3FP	-0.43								HS3ST3B1	0.58
ZNF771	-0.43								TDO2	0.58
ANKRD13B	-0.44								GRAP2	0.58
CHPT1	-0.44								CXORF21	0.57
FAM53A	-0.44								NECAP2	0.57
OIP5	-0.44								CD8B	0.57
PALM	-0.44								HLA-C	0.57
PDE3B	-0.44								CLECL1	0.57
PRAME	-0.44								GIMAP8	0.57
PTPLAD1	-0.44								NLRC5	0.57
RIC8B	-0.44								LY86	0.57
SEC11C	-0.44								MAF	0.57
TATDN3	-0.44								C1S	0.57
TMEM117	-0.44								ACAP1	0.57
ZNF235	-0.44								LAG3	0.57
CCDC167	-0.45								NCR3	0.57
HOXC13	-0.45								CXCR3	0.57
PLEKHA1	-0.45								PPP2R2B	0.57
PPFIA3	-0.45								CD52	0.57
PRDX1	-0.45								CD70	0.57
PXN-AS1	-0.45								AQP9	0.57
SLC47A1	-0.45								SYNE3	0.57
TLE6	-0.45								TMEM52B	0.57
TSPAN33	-0.45								MATK	0.57
ZNF219	-0.45								OSCAR	0.57
ABCB6	-0.46								ITGAX	0.57
ACACB	-0.46								P2RY12	0.56
AP3B2	-0.46								NCF4	0.56
ARID2	-0.46								THEMIS2	0.56
CACNA2D2	-0.46								ARPC2	0.56
E2F2	-0.46								GNA13	0.56
GNAZ	-0.46								GNAI2	0.56
NCOA1	-0.46								BTN3A2	0.56
RAVER2	-0.46								DOK3	0.56
SPAST	-0.46								HCLS1	0.56
SRSF6	-0.46								TMEM229B	0.56
ZNF397	-0.46								KLRB1	0.56
ATP5G3	-0.47								IFIT3	0.56
B4GALNT1	-0.47								GPR18	0.56
FECH	-0.47								TBC1D10C	0.56
HOXC4	-0.47								PLEKHA2	0.56
NDRG2	-0.47								MILR1	0.56
BTG2	-0.48								SLC2A5	0.56
FLVCR1	-0.48								JAML	0.56
CPT1A	-0.49								RUNX3	0.56
TSNAX	-0.49								ALOX5AP	0.56
C1orf131	-0.5								IL18R1	0.56
HSD17B10	-0.5								IFFO1	0.56
KBTBD6	-0.5								BHLHE41	0.56
NECAB3	-0.5								CCR4	0.56
RMND5A	-0.5								ARHGAP18	0.55
ALDH1A1	-0.51								ADORA3	0.55
LOC643072	-0.51								CSF2RA	0.55
GNG4	-0.52								TRAF1	0.55
KBTBD7	-0.52								COTL1	0.55
SPIRE2	-0.52								TM6SF1	0.55
CBX2	-0.53								NOD2	0.55
ID2	-0.53								PTPRCAP	0.55
MTERFD3	-0.53								PIP4K2A	0.55
GSTA4	-0.59								KMO	0.55
PIR	-0.61								TMEM26	0.55
									KCNJ10	0.55
									MAP4K1	0.55
									PARVG	0.55
									ALOX5	0.55
									IDO1	0.55
									TGFBI	0.55
									LOXL3	0.55
									CCL18	0.55
									ATG7	0.54
									CCL13	0.54
									STAMBPL1	0.54
									C5ORF56	0.54
									RIC1	0.54
									NCR1	0.54
									PSAP	0.54
									UBD	0.54
									FMNL1	0.54
									CD163L1	0.54
									GAB3	0.54
									DAPP1	0.54
									STK4	0.54
									TRIM69	0.54
									HLA-F	0.54
									MMP25	0.54
									VSIR	0.54
									RASAL3	0.54
									FUT7	0.54
									ZNF831	0.54
									ZNF683	0.54
									PTGDR	0.54
									CXCL12	0.54
									VIM	0.54
									NAIP	0.53
									SUSD3	0.53
									PIK3CD-AS1	0.53
									IL9R	0.53
									APOBEC3C	0.53
									CD44	0.53
									LIMS1	0.53
									ENTPD1	0.53
									OPTN	0.53
									STARD8	0.53
									FLT3LG	0.53
									QKI	0.53
									CTSK	0.53
									NLRC3	0.53
									CD74	0.53
									IL1B	0.53
									MYO5A	0.53
									KLRC1	0.53
									CPED1	0.53
									SOD2	0.53
									GFPT2	0.53
									PPP1R16B	0.53
									LPAR5	0.53
									TLR6	0.53
									ZBP1	0.53
									TCAF2	0.53
									SAMD9	0.53
									GAS7	0.53
									HLA-DQA2	0.52
									C15ORF53	0.52
									LILRA3	0.52
									STAB1	0.52
									PEA15	0.52
									SH2D2A	0.52
									MICB	0.52
									VAV1	0.52
									CIITA	0.52
									ARID5A	0.52
									RGL4	0.52
									PLA2G4C	0.52
									ARL11	0.52
									PIK3CD	0.52
									INPP5D	0.52
									RASGRP3	0.52
									ANKRD44	0.52
									ZAP70	0.52
									LAX1	0.52
									TMIGD2	0.52
									GPR82	0.52
									MFNG	0.52
									AKAP5	0.52
									IFIT2	0.52
									IFIH1	0.52
									CXCR4	0.52
									CRYBB1	0.51
									RHOG	0.51
									P2RY14	0.51
									PRCP	0.51
									ZNF101	0.51
									SSPN	0.51
									CCL2	0.51
									LILRA4	0.51
									JAK3	0.51
									CD1D	0.51
									CYLD	0.51
									RELT	0.51
									NAAA	0.51
									HIVEP3	0.51
									RECQL	0.51
									SIGLEC8	0.51
									KCTD12	0.51
									MAP7D3	0.51
									RHOH	0.51
									PLCL2	0.51
									VNN2	0.51
									STAT4	0.51
									RASSF2	0.51
									ABCA1	0.51
									LOC154761	0.51
									NXPE3	0.51
									RASSF4	0.5
									LINC00158	0.5
									RAB32	0.5
									APOBEC3D	0.5
									NTAN1	0.5
									GRB2	0.5
									BATF2	0.5
									ARHGEF3	0.5
									PXK	0.5
									CLIC4	0.5
									SOWAHD	0.5
									HLA-H	0.5
									LYPD5	0.5
									AKAP2	0.5
									CCDC88A	0.5
									FGD3	0.5
									MITF	0.5
									MMP9	0.5
									FMO1	0.5
									CASS4	0.5
									TTC24	0.5
									ADGRG5	0.5
									GPR176	0.5
									LOC606724	0.5
									PRDM1	0.5
									GRIP2	0.5
									MOB1A	0.49
									TMEM106A	0.49
									SLC2A6	0.49
									CTSC	0.49
									PSMB8	0.49
									FKBP15	0.49
									TNS3	0.49
									LNPEP	0.49
									SP100	0.49
									FNBP1	0.49
									ELK3	0.49
									OGFRL1	0.49
									NABP1	0.49
									IKZF3	0.49
									NAALADL1	0.49
									TRIM22	0.49
									HLA-DRB1	0.49
									GPR137B	0.49
									PDE4B	0.49
									2018-09-01	0.49
									RASGRP4	0.49
									TREM2	0.49
									LY9	0.49
									SIGLEC11	0.49
									BEST1	0.49
									ATP10D	0.49
									PMP22	0.49
									CCRL2	0.49
									CNRIP1	0.49
									TGM2	0.49
									CD27	0.49
									EGR2	0.49
									TRIM21	0.48
									CAPG	0.48
									C12ORF4	0.48
									DUSP2	0.48
									BEND6	0.48
									PLCXD2	0.48
									UBE2E2	0.48
									RALB	0.48
									RAB31	0.48
									SSTR3	0.48
									FGFR1OP2	0.48
									ARSB	0.48
									FLVCR2	0.48
									ZYX	0.48
									ICAM3	0.48
									LINC00426	0.48
									LY75	0.48
									PRNP	0.48
									RNASE2	0.48
									SLC36A1	0.48
									PRR16	0.48
									MCTP1	0.48
									LAT	0.48
									CSGALNACT2	0.48
									HLA-DPB2	0.48
									CD101	0.48
									WISP1	0.48
									DCSTAMP	0.48
									MYLK	0.48
									TMEM86A	0.48
									CDX1	0.47
									SPATC1	0.47
									MMP12	0.47
									STK17A	0.47
									ADA2	0.47
									NCK1	0.47
									TNFAIP6	0.47
									ZNF80	0.47
									TUBB6	0.47
									GIT2	0.47
									ETV7	0.47
									UBASH3B	0.47
									RGS1	0.47
									TPK1	0.47
									HLA-DOB	0.47
									DDX60	0.47
									NCEH1	0.47
									ZBTB32	0.47
									CNTLN	0.47
									DPYD	0.47
									RCBTB2	0.47
									CD40LG	0.47
									IGFLR1	0.46
									OSTF1	0.46
									NUB1	0.46
									CYB5R4	0.46
									SNX2	0.46
									ITGAE	0.46
									SIRPD	0.46
									ZNF699	0.46
									RGS19	0.46
									FAM225B	0.46
									MDFIC	0.46
									PSMB10	0.46
									ESYT1	0.46
									CRYBG1	0.46
									XRN1	0.46
									IL32	0.46
									OSBPL8	0.46
									LAYN	0.46
									RRAGC	0.46
									APOC2	0.46
									IFI35	0.46
									IFI16	0.46
									CEP85L	0.46
									LOX	0.46
									CD200	0.46
									DCN	0.46
									LPAR6	0.45
									KLRC4	0.45
									ARNTL2	0.45
									PPM1M	0.45
									NMI	0.45
									CACNA2D4	0.45
									KLRG1	0.45
									AAED1	0.45
									RGS10	0.45
									KLHL4	0.45
									SH3BGRL	0.45
									MYD88	0.45
									CTSZ	0.45
									AMPD3	0.45
									HLA-A	0.45
									NFATC2	0.45
									CCL7	0.45
									MANEA	0.45
									LGALS2	0.45
									CLEC5A	0.45
									ERAP1	0.45
									PLSCR1	0.45
									ST3GAL2	0.45
									RSAD2	0.45
									GPR132	0.45
									OAS2	0.45
									TMEM236	0.44
									NR1H3	0.44
									NAT8B	0.44
									ITM2A	0.44
									NBN	0.44
									PARP12	0.44
									BTN2A2	0.44
									CCL23	0.44
									IL7	0.44
									APOBEC3A	0.44
									CLEC4C	0.44
									FUOM	0.44
									LACC1	0.44
									C9ORF139	0.44
									DCK	0.44
									EPS15	0.44
									TGFB1	0.44
									SMIM3	0.44
									RIN3	0.44
									PRKCH	0.44
									N4BP2L1	0.44
									LXN	0.44
									WDFY1	0.44
									PRKD3	0.44
									MEI1	0.44
									ANO6	0.44
									MGAT1	0.44
									OSM	0.44
									IL21	0.43
									M6PR	0.43
									NAGK	0.43
									ACTR3	0.43
									CRLF3	0.43
									MOSPD2	0.43
									PARVB	0.43
									CCDC90B	0.43
									PVRIG	0.43
									LEPROT	0.43
									TRAF3	0.43
									IFNGR1	0.43
									GPATCH11	0.43
									GPATCH2L	0.43
									NFKBIE	0.43
									PARP9	0.43
									IL3RA	0.43
									IRF5	0.43
									MARCKS	0.43
									HLA-DRB6	0.43
									PLA2G5	0.43
									SECTM1	0.43
									RASA2	0.43
									USP15	0.42
									SNX3	0.42
									SLC25A46	0.42
									ARL6IP5	0.42
									LY96	0.42
									TSPAN33	0.42
									HLA-L	0.42
									MAT2B	0.42
									MSL3	0.42
									LUZP6	0.42
									C10ORF55	0.42
									EHD4	0.42
									PLAU	0.42
									GPC6	0.42
									PI4K2A	0.42
									PLA2G15	0.42
									FRMD4A	0.42
									B3GALNT1	0.42
									XCL1	0.42
									CAP1	0.42
									SPHK1	0.42
									LRRK1	0.42
									SLC29A3	0.42
									CGAS	0.41
									RP2	0.41
									PSME2	0.41
									GBP7	0.41
									RASGEF1B	0.41
									PPT1	0.41
									C9ORF72	0.41
									CCL3L1	0.41
									RAP2C	0.41
									SYK	0.41
									CCDC50	0.41
									HACD4	0.41
									CARD8	0.41
									CLC	0.41
									LPAR4	0.41
									IL22RA2	0.41
									TNF	0.41
									LYL1	0.41
									CMPK2	0.41
									C3ORF38	0.4
									PTPN6	0.4
									CASP4	0.4
									GYG1	0.4
									RAP1A	0.4
									PIP4P2	0.4
									ITGAD	0.4
									ACER3	0.4
									EIF5A2	0.4
									LIMD2	0.4
									MAN2A1	0.4
									DIRC1	0.4
									SH3BP1	0.4
									JAZF1	0.4
									TBC1D2B	0.4
									CCDC24	-0.4
									PATZ1	-0.4
									SETD6	-0.4
									ARHGEF16	-0.4
									RAB17	-0.4
									GRHL2	-0.41
									PRPF40B	-0.41
									SLC22A23	-0.41
									ZNF692	-0.41
									C1ORF210	-0.41
									C11ORF49	-0.41
									RAB25	-0.41
									PELP1	-0.41
									MMP15	-0.41
									GPRC5C	-0.41
									AP1M2	-0.41
									CLDN7	-0.42
									FAM83E	-0.42
									BICDL2	-0.42
									LLGL2	-0.42
									NR2F6	-0.43
									ATP1B1	-0.43
									LARGE2	-0.43
									GYG2	-0.43
									CACFD1	-0.43
									KDF1	-0.44
									TM7SF2	-0.44
									GAS8	-0.44
									LZTS3	-0.44
									FAM174B	-0.45
									ARHGAP8	-0.45
									ZNF444	-0.45
									RGL3	-0.46
									CAMSAP3	-0.46
									SPIRE2	-0.47
									RAB40C	-0.47
									RAB40B	-0.47
									OVOL2	-0.48
									ESRP2	-0.48
									ICA1	-0.5
									FN3K	-0.5
									RBBP8NL	-0.51
									HID1	-0.55
